# Supplementary material for: The impact of COVID-19 on the lives of community- dwelling people with dementia and informal carers in the context of using the social and medical services – a qualitative study
Source: Research Square preprint supplement (doi:10.21203/rs.3.rs-415217/v1), 2021-04-22
Supplement: Supplementary file 1 [file 2cbfaeaa25fdfbc083a5d7f2.docx]

**Additional file 1: Supplementary quotes**

| **THEME 1:** **Care re-organization** | |
| --- | --- |
| **SUB-THEMES** | |
| **Burden of care** | *“When the pandemic broke out, the paid carer simply left, only me remained. I mean, the neighbours helped us and someone else from the family. But at this moment everything is on me.”*  Male Informal Carer, 80, Husband, Interview 18 |
| *“Dad's condition was getting worse, we were supposed to look for a nursing home from March, but they closed...”*  Male Informal Carer, 55, Son, Interview 20 |
| *“I was very burdened, I must say, both temporally and emotionally. Because I had to think about my household, for everything else to buy there, and about a household of my mother-in-law, because she did not always manage. It certainly had a negative impact on me, on my psyche as a carer, somehow negatively.”*  Female Informal Carer, 60, Daughter-in-law, Interview 6 |
| **Shutdown**  **or restrictions on operation**  **of day care facilities** | *“Now my father-in-law goes into a day care facility seven days a month. I mean, some weeks twice, and some weeks once. That's exactly what bothers me, because if he drove every day, it would be easier for me to organize it.”*  Female Informal Carer, 60, Daughter-in-law, Interview 6 |
| *“There were a few daughters who took leave to be able to look after their mothers, who would simply be left without care because they are dependent. They had to organize their life somehow, because there was no such support for many hours, they simply took annual leave*.”  Female Informal Carer, 55, Daughter, Interview 16 |
| *“Dad used to commute [to the day care facility] himself, now he doesn’t leave the house alone… He had friends, he played cards, now he doesn’t…”*  Male Informal Carer, 55, Son, Interview 20 |
| *“[At the day care facility]* *time passes so quickly!”*  Male, Person with dementia, 87, Interview 2 |
| *“We didn’t attend [to day care facility]* *but we had dinners refunded and delivered.”*  Male, Person with dementia, 87, Interview 2 |
| *“Now we are divided into three groups, five-six people each. Our is 6 people. We are the artistic one. Generally, we are isolated.”*  Female, Person with dementia, 82, Interview 1 |
| *“Before we were all together, now the residents are divided into three groups. And the day care facility closes faster now.”*  Male, Person with dementia, 87, Interview 2 |
| **Access to medical help** | *“I would like to be able to call the clinic, because the pharmacist said that my father was given the same drug twice, under different names. I would like to consult a psychiatrist, but it is impossible, the phone is still busy...”*  Male Informal Carer, 55, Son, Interview 20 |
| *„During the coronavirus pandemic access to doctors’ care is extremely reduced as well as treating patients with anything different from coronavirus.”*  Female Informal Carer, 75, Wife, Interview 9 |
| *“There are problems because there is a deadline of several days when you want to register, for example, for an appointment or even for a prescription. It's 4-5 days to wait for a prescription. It is these four days that you have to wait to get to the doctor by phone. So, there are troubles.”*  Female, Person with dementia, 76, Interview 4 |
| *“And this telemedicine... maybe it doesn't quite meet my expectations. Actually, they are mine and my husband's. For example, when we have a cold, we want the doctor to see us, we want him to listen, to examine our throats, to take care of the patient.”*  Female, Person with dementia, 70, Interview 5 |
| **THEME 2: Psychological response** | |
| **SUB-THEMES** | |
| **Uncertainty and anxiety** | *“I felt that I would be burdened again. My sleep got worse and my GP gave me sleeping pills.”*  Male Informal Carer, 55, Son, Interview 12 |
| *“I don’t have negative [emotions]. I just had a task: not to let senior person to contact with other people. And I did it.”*  Female Informal Carer, 58, Daughter, Interview 14 |
| *“If it weren't for the optimism, we couldn't deal with such problems.”*  Female Informal Carer, 75, Wife, Interview 9 |
| *“Well, I felt terrible when the day care facility was closed. It was just a big blow to me because I started to wonder what I should do; because the established order of the day, which as if it was accepted by everyone, suddenly collapsed.”*  Female Informal Carer, 58, Daughter, Interview 1 |
| *„It was very stressful factor for me as the situation prolonged in time. There was a sense of risk. Consequently, I had to be prepared for various scenarios.”*  Male Informal Carer, 58, Son, Interview 8 |
| *“Now there is a relapse of this coronavirus. There are many cases. And the fear of going to the store, there it is.”*  Female, Person with dementia, 70, Interview 5 |
| *“Well, it changed for sure, because in the times before the coronavirus, it was freedom. Somewhere this subconscious mind is that one is afraid. I have that character. I'm a little bit timid.”*  Female, Person with dementia, 70, Interview 5 |
| *“I pay attention to wearing a mask, it [COVID-19] scares me.”*  Female, Person with dementia, 82, Interview 1 |
| *“In the end I managed to get things done [to contact with the doctor] but it cost me so much stress.”*  Female, Person with dementia, 76, Interview 4 |
| **Loneliness** | *“I didn't feel it [social isolation], because I was working all this time, there was no other option. But mom endured it very poorly, because at first it was difficult for her, it was difficult to keep her at home at all, that she couldn't leave, that she had to be at home, that she had to wear a mask.”*  Female Informal Carer, 58, Daughter, Interview 1 |
| *“I was doing better, but my husband [a person with dementia] felt like he was forced to be locked at home, that we were supposedly infected. Because of the news on television, he interpreted it this way, and even later, when you [a psychiatrist] probably also told not to let the news go round and round, because unfortunately, he was learning that if he doesn't come out, it means that he has coronavirus. But it has to be said, the husband was emotionally affected that he could not leave. He did not want to get out of bed. He still doesn't want to, he acts as if he was <<sick>>…”*  Female Informal Carer, 80, Wife, Interview 5 |
| *„We got used to it a bit, but it is getting more and more difficult. I'm going out a bit, I'm trying to see people, but at first my mom's friends from Senior Plus [day care facility] called, now those calls have stopped... I don't know what's going to happen next, it's going to be even worse in the autumn.”*  Female Informal Carer, 65, Daughter, Interview 7 |
| *“Most of all I felt this ... it was probably a form of fear, fear for my mother that it would be very hard for her to come back later. This is what I was most afraid of. Because I knew that this social foothold was gained with quite a lot of difficulty and my mother's great resistance, and I knew that if we lose it for a while, it would be much, much more difficult to come back. And that's it, that's the way my medicine went.”*  *Male Informal Carer, 58, Son, Interview 15* |
| *“Well, we fenced in our house.”*  Female, Person with dementia, 70, Interview 5 |
| *„As we were closed and not able to meet with others, it just felt like a prison. It was hard to handle.”*  Female, Person with dementia, 82, Interview 1 |
| *“Because it's just entertainment [participation in day care facility]. One is not bored, because at home you could go crazy.”*  Male, Person with dementia, Interview 2 |
| **Acceptance** | *“I very rarely went outside. If I went out, I would go out into the yard. Because I had such an opportunity that I could go out to my garden and sit, you know, in a nice surrounding.”*  Female, Person with dementia, 75, Interview 3 |
| *“Despite this isolation, these contacts are, aren't they? There is also medical care. Admittedly by phone, but it is. Or we go privately, you know, then this contact is personal. Well, I don't feel such a limitation.”*  Female, Person with dementia, 70, Interview 5 |
| **THEME 3: Emerging needs** | |
| **SUB-THEMES** | |
| **Institutional support** | *“I mean, surely, if there was extra care at home, for example, some extra exercises to get the father-in-law started. Because I can see that I can't bring him to the bus stop anymore. He feels so tired that I simply tire him out. And I don't have any other option, I don't drive a car, my husband goes to work. So, I just bring him to my house with such an effort to keep an eye on him here. So that he doesn't sleep all the time, to practice with him or something. Some extra care at home, it would certainly be useful.”*  Female Informal Carer, 60, Daughter-in-law, Interview 6 |
| *“Some of informal carers went to Municipal Social Welfare Centre for care services, they did not always receive it, because it was such a very, very difficult period.”*  Female Informal Carer, 55, Daughter, Interview 16 |
| *“I counted on this social welfare home that it might relieve us. And now we not only have to look after, but also watch over and control my father.”*  Male Informal Carer, 55, Son, Interview 20 |
| **Social support** | *“Sometimes it happens that I have some moments of weakness, but my sister puts me upright, sometimes I put her upright and we support each other somehow.”*  Female Informal Carer, 60, Daughter, Interview 17 |
| *“I don't have my family close here. I mean …. there is a young family member who is an airline flight attendant. And he helped a lot, it must be admitted. Well*, *when the air travels were resumed, he returned to work. But it helped very intensively and very regularly.”*  Male Informal Carer, 80, Husband, Interview 18 |
| *“I went to get a newspaper, something like that, but I wasn't shopping. My children were doing it for me. I didn't even cook because they brought me dinners. So, I had a luxury!”*  Female, Person with dementia, 82, Interview 1 |
| **Remote contacts** | *„[Teleconsultations] are quite difficult to put into everyday practice, as, firstly, she is not fluent in it and moreover she does not like remote options.”*  Male Informal Carer, 57, Son, Interview 8 |
| *[Teleconsultations] “It greatly helped us. It added wings, really. They helped us a lot.”*  Female Informal Carer, 60, Daughter, Interview 17 |
| *“We had more time for ourselves, more time for the garden. In fact, I missed Easter the most, so we spent our time at the laptop. We also shared eggs virtually for Easter. Reunited into three families. Well, we made it!”*  Female Informal Carer, 77, Wife, Interview 19 |
